# Supplementary material for: “I Work Twice as Hard to Look Normal”: Lived Workplace Experiences of Adults With ADHD Across Cultures
Source: Research Square preprint supplement (doi:10.21203/rs.3.rs-8547581/v1), 2026-02-12
Supplement: Supplementary file 1 [file c3cf6c3aec6ab8da0fe463a0.docx]

#

## **Methodological Transparency for Narrative Synthesis**

### **Study Title**

“I Work Twice as Hard to Look Normal”: Lived Workplace Experiences of Adults With ADHD Across Cultures

## **1. Nature and Purpose of This Supplementary File**

This supplementary file is provided to enhance transparency and methodological rigor for the qualitative narrative synthesis reported in the main manuscript. As the study is interpretive and qualitative in nature, no primary data collection, participant recruitment, or bibliometric datasets were involved. Accordingly, this file documents the search strategy, inclusion and exclusion criteria, and narrative analytical framework used to synthesize first-person accounts of adult ADHD in workplace contexts.

This file is intended to enable readers, reviewers, and editors to assess the credibility, coherence, and traceability of the analytical process.

## **2. Study Design Overview**

The study employed a qualitative narrative synthesis design. Narrative synthesis is an established qualitative approach used to integrate and interpret findings from multiple qualitative sources while preserving meaning, context, and voice. The emphasis is on patterns of experience and meaning-making, rather than on aggregation, frequency counts, or bibliometric indicators.

The unit of analysis in this study was narrative content (first-person accounts, quotations, and experiential descriptions), not individual participants or publication records.

## **3. Data Sources**

Narrative materials were drawn exclusively from secondary, publicly available sources, including:

- Peer-reviewed qualitative studies reporting first-person accounts of adults with ADHD in workplace or occupational contexts
- Autobiographical and reflexive narrative writings authored by adults with ADHD and published in academic or professional outlets
- Experiential reports and qualitative syntheses explicitly foregrounding lived experience at work

No unpublished data, confidential materials, or restricted datasets were accessed.

## **4. Search Strategy and Databases Consulted**

Targeted literature searches were conducted between 2023 and 2024 using the following databases and platforms:

- PsycINFO
- PubMed
- Google Scholar

Searches were supplemented by manual reference list screening of key qualitative studies to identify additional relevant narrative sources.

### **Example Search Strings**

Search terms were adapted slightly across databases. Representative search strings included:

- "adult ADHD" AND "workplace experience" AND qualitative
- "ADHD" AND "lived experience" AND work
- "neurodiversity" AND "ADHD" AND employment AND narrative
- "attention deficit hyperactivity disorder" AND work AND qualitative

Searches were restricted to English-language publications.

## **5. Time Frame**

Publications from 2000 to 2024 were considered. This time frame was selected to capture contemporary conceptualizations of adult ADHD while allowing sufficient depth of qualitative literature.

## **6. Inclusion Criteria**

Narrative sources were included if they met all of the following criteria:

1. Authored by adults (18 years or older) with a self-reported or clinically diagnosed ADHD
2. Explicit focus on workplace, employment, or occupational experiences
3. Inclusion of first-person perspectives, verbatim participant quotations, or autobiographical narrative material
4. Publication in peer-reviewed journals, academic books, or reputable professional outlets
5. Availability in the public domain
6. Publication in English

## **7. Exclusion Criteria**

Sources were excluded if they:

- Were purely quantitative with no experiential or narrative component
- Focused exclusively on childhood or adolescent ADHD
- Addressed clinical symptomatology without reference to work or employment
- Were opinion pieces without experiential grounding
- Were inaccessible or behind restricted access without available narrative content

## **8. Narrative Coding and Analytical Framework**

Analysis followed a thematic narrative analysis approach, emphasizing meaning, storyline, and context rather than categorical diagnosis or symptom counts.

### **Analytical Stages**

**Stage 1: Immersion and Familiarization**All included sources were read repeatedly to identify recurring narrative patterns, metaphors, emotional tones, and descriptions of workplace interaction.

**Stage 2: Inductive Narrative Coding**Narrative segments were coded inductively to capture shared experiential patterns. Codes focused on lived processes such as cognitive effort, masking, disclosure, interaction with organizational structures, and experiences of agency or constraint.

**Stage 3: Theme Development**Related narrative codes were clustered into higher-order themes that reflected recurrent storylines across cultural contexts. Themes were refined iteratively through comparison across sources.

**Stage 4: Interpretive Lens**Final themes were interpreted using **empowerment theory**, focusing on perceived control, autonomy, participation, and relational power within workplace systems.

## **9. Core Narrative Themes Identified**

The following core themes emerged from the synthesis:

1. Invisible cognitive labor required to meet baseline workplace expectations
2. Compensatory overwork, masking, and burnout
3. Disclosure dilemmas shaped by stigma and conditional acceptance
4. Structural rigidity and systemic misfit between ADHD cognitive styles and workplace design
5. Reclaiming agency through autonomy, supportive leadership, and strengths-based role alignment

These themes are elaborated in the Results section of the main manuscript and mapped to empowerment constructs in synthesis tables.

## **10. Data Availability Clarification**

No primary data were generated for this study. No participant-level raw datasets, database export files, deduplication logs, or statistical scripts exist. All materials analyzed were drawn from publicly available sources, and analytical transparency is ensured through the documentation provided in this supplementary file and in the main manuscript.

## **11. Ethical Considerations**

As this study involved secondary analysis of publicly available narrative sources and did not include direct interaction with human participants, formal ethical approval and informed consent were not required.

## **12. Intended Use of This File**

This supplementary document is provided to support editorial and peer review assessment and to demonstrate methodological clarity, transparency, and rigor appropriate to a qualitative narrative synthesis.
